# Supplementary material for: Genomic divergence and cohesion in a species of pelagic freshwater bacteria
Source: PubMed Central journal article supplement (PMC5644125; doi:10.1186/s12864-017-4199-z), 2017-10-16

## August 2014

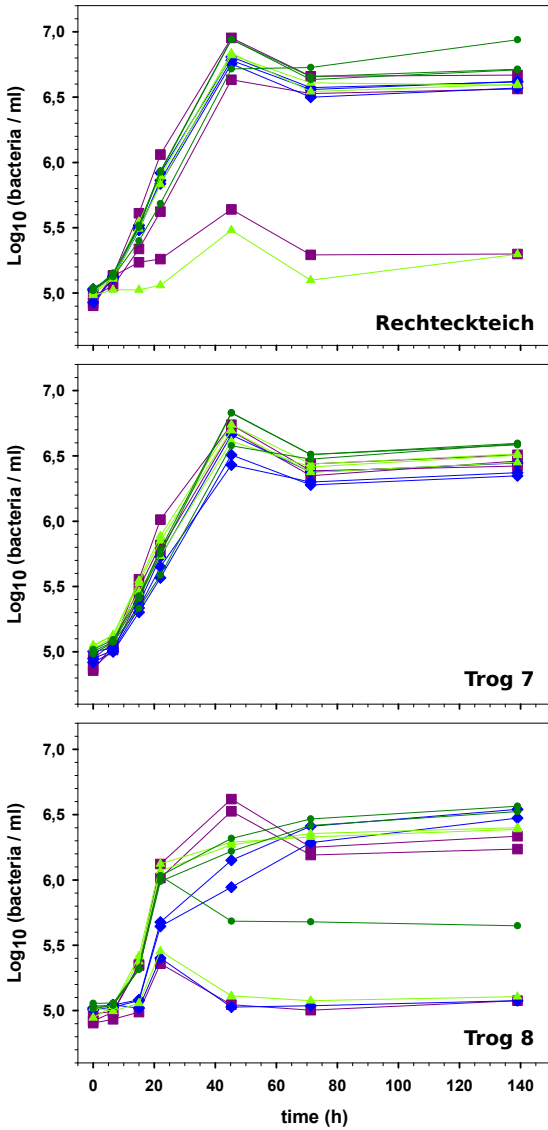

## September/October 2014

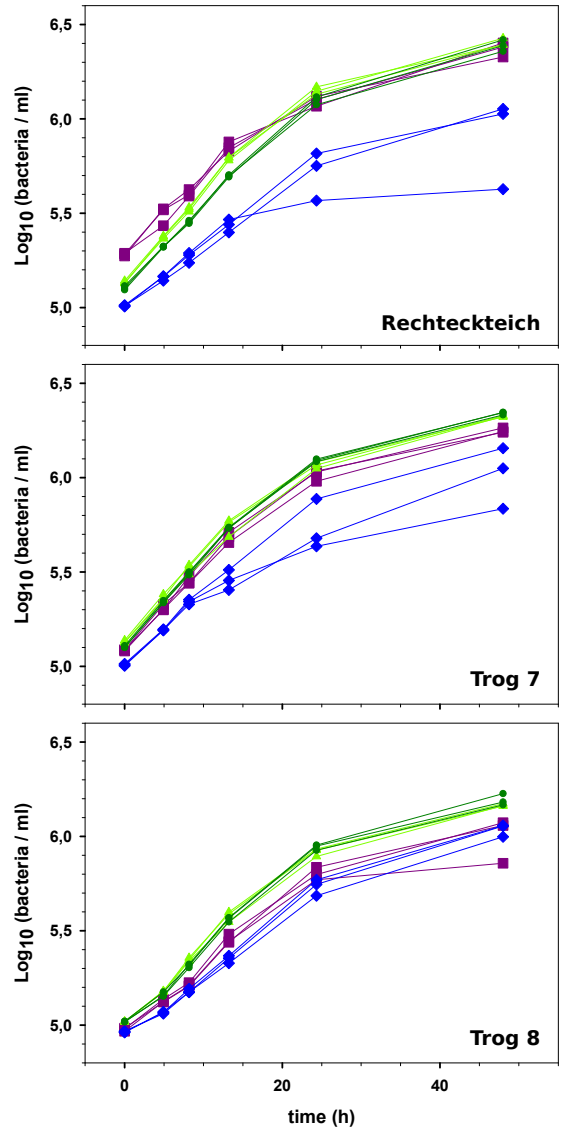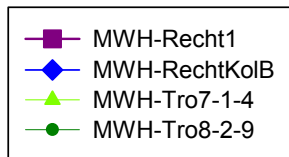

Supplement: 12864_2017_4199_MOESM7_ESM.pdf [file 12864_2017_4199_MOESM7_ESM.pdf]
